# Supplementary material
Source: publisher site journal article supplement (https://www.dovepress.com/article/376927)
Supplement: Supplementary file 1 [file get_supplementary_file.php]

20200612 Marina Buljac en Anoek Braam

physician-physician collaboration in hospital

| **Database searched** | **via** | **Years of coverage** | **Records** | **Records after duplicates removed** |
| --- | --- | --- | --- | --- |
| Embase | Embase.com | 1971 - Present | 2882 | 2838 |
| Medline ALL | Ovid | 1946 - Present | 2761 | 707 |
| Web of Science Core Collection | Web of Knowledge | 1975 - Present | 2306 | 797 |
| Cochrane Central Register of Controlled Trials | Wiley | 1992 - Present | 567 | 357 |
| PsycINFO | Ovid | 1806 - Present | 876 | 210 |
| Other sources: Google Scholar | | | 200 | 165 |
| **Total** | | | **9592** | **5074** |

**Embase**

(((('interdisciplinary communication'/de OR 'clinical handover'/exp) AND (('physician'/exp NOT 'general practitioner'/exp) OR 'clinician'/de OR 'multidisciplinary team'/exp OR 'medical profession'/exp)) NOT ('doctor nurse relation'/exp OR 'professional-patient relationship'/exp OR 'nurse'/exp OR 'nursing staff'/de)) OR (((interphysician* OR inter-physician* OR physician*-physician* OR doctor*-doctor* OR interdoctor* OR inter-doctor* OR clinician*-clinician* OR inter-clinician* OR interclinician OR specialist*-specialist* OR interspecialist* OR inter-specialist*) NEAR/6 (collaborat* OR communicat* OR cooperat* OR handover* OR hand-off* OR handoff* OR changeover* OR signout* OR sign-out* OR transitional-care* OR transition-of-care*))):ab,ti,kw OR (((collaborat* OR communicat* OR cooperat* OR handover* OR hand-off* OR handoff* OR changeover* OR signout* OR sign-out* OR transitional-care* OR transition-of-care*) NEAR/6 (physician* OR doctor* OR clinician* OR medical-profession* OR anesthesiologist* OR anaesthesiologist* OR cardiologist* OR dermatologist* OR endocrinologist* OR geriatrician* OR gynecologist* OR gynaecologist* OR urogynecologist* OR urogynaecologist* OR hematologist* OR haematologist* OR neurologist* OR obstetrician* OR oncologist* OR otolaryngologist* OR pathologist* OR cytopathologist* OR pediatrician* OR paediatrician* OR pulmonologist* OR pneumologist* OR radiologist* OR rontgenologist* OR roentgenologist* OR rheumatologist* OR surgeon* OR neurosurgeon* OR urologist* OR intraprofessional OR interprofessional OR interdisciplinary OR inter-disciplinary OR intradisciplinary OR intra-disciplinary OR transdisciplinary OR trans-disciplinary OR multidisciplinary OR multi-disciplinary OR cross-disciplinary OR crossdisciplinary OR diabetologist* OR epileptologist* OR gastroenterologist* OR gerontologist* OR hepatologist* OR immunologist* OR intensivist* OR internist* OR geneticist* OR neonatologist* OR nephrologist* OR ophthalmologist* OR phlebologist* OR physiatrist* OR podiatrist* OR vaccinologist* OR venereologist* OR staff*)) NOT (((nurse* OR ((physician* OR doctor* OR clinician* OR medical-profession* OR anesthesiologist* OR anaesthesiologist* OR cardiologist* OR dermatologist* OR endocrinologist* OR geriatrician* OR gynecologist* OR gynaecologist* OR urogynecologist* OR urogynaecologist* OR hematologist* OR haematologist* OR neurologist* OR obstetrician* OR oncologist* OR otolaryngologist* OR pathologist* OR cytopathologist* OR pediatrician* OR paediatrician* OR pulmonologist* OR pneumologist* OR radiologist* OR rontgenologist* OR roentgenologist* OR rheumatologist* OR surgeon* OR neurosurgeon* OR urologist*) NEAR/2 (patient* OR family* OR carer* OR caregiver* OR GP OR GPs OR general-practitioner* OR psychologist* OR psychiatrist*)))))):ti,kw) AND ('questionnaire'/exp OR 'rating scale'/exp OR 'scoring system'/exp OR 'clinical trial'/exp OR 'interview'/exp OR 'psychometry'/de OR 'quantitative analysis'/de OR 'validation study'/de OR 'Likert scale'/de OR (questionnaire* OR survey* OR mixed-method* OR scale* OR score* OR scoring OR assessment* OR trial* OR random* OR RCT OR RCTs OR interview* OR tool* OR AITCS* OR quantitativ* OR validation OR likert* OR psychometr*):ab,ti,kw) NOT ([Conference Abstract]/lim) AND [ENGLISH]/lim

**Medline**

((((Interdisciplinary Communication/ OR Patient Handoff/ OR Transitional Care/) AND ((exp Physicians/ NOT General Practitioners/) OR Specialization/)) NOT (Physician-Nurse Relations/ OR exp Professional-Patient Relations/ OR Professional-Family Relations/ OR exp Nurses/ OR Nursing Staff/)) OR (((interphysician* OR inter-physician* OR physician*-physician* OR doctor*-doctor* OR interdoctor* OR inter-doctor* OR clinician*-clinician* OR inter-clinician* OR interclinician OR specialist*-specialist* OR interspecialist* OR inter-specialist*) ADJ6 (collaborat* OR communicat* OR cooperat* OR handover* OR hand-off* OR handoff* OR changeover* OR signout* OR sign-out* OR transitional-care* OR transition-of-care*))).ab,ti,kf. OR (((collaborat* OR communicat* OR cooperat* OR handover* OR hand-off* OR handoff* OR changeover* OR signout* OR sign-out* OR transitional-care* OR transition-of-care*) ADJ6 (physician* OR doctor* OR clinician* OR medical-profession* OR anesthesiologist* OR anaesthesiologist* OR cardiologist* OR dermatologist* OR endocrinologist* OR geriatrician* OR gynecologist* OR gynaecologist* OR urogynecologist* OR urogynaecologist* OR hematologist* OR haematologist* OR neurologist* OR obstetrician* OR oncologist* OR otolaryngologist* OR pathologist* OR cytopathologist* OR pediatrician* OR paediatrician* OR pulmonologist* OR pneumologist* OR radiologist* OR rontgenologist* OR roentgenologist* OR rheumatologist* OR surgeon* OR neurosurgeon* OR urologist* OR intraprofessional OR interprofessional OR interdisciplinary OR inter-disciplinary OR intradisciplinary OR intra-disciplinary OR transdisciplinary OR trans-disciplinary OR multidisciplinary OR multi-disciplinary OR cross-disciplinary OR crossdisciplinary OR diabetologist* OR epileptologist* OR gastroenterologist* OR gerontologist* OR hepatologist* OR immunologist* OR intensivist* OR internist* OR geneticist* OR neonatologist* OR nephrologist* OR ophthalmologist* OR phlebologist* OR physiatrist* OR podiatrist* OR vaccinologist* OR venereologist* OR staff*)) NOT (((nurse* OR ((physician* OR doctor* OR clinician* OR medical-profession* OR anesthesiologist* OR anaesthesiologist* OR cardiologist* OR dermatologist* OR endocrinologist* OR geriatrician* OR gynecologist* OR gynaecologist* OR urogynecologist* OR urogynaecologist* OR hematologist* OR haematologist* OR neurologist* OR obstetrician* OR oncologist* OR otolaryngologist* OR pathologist* OR cytopathologist* OR pediatrician* OR paediatrician* OR pulmonologist* OR pneumologist* OR radiologist* OR rontgenologist* OR roentgenologist* OR rheumatologist* OR surgeon* OR neurosurgeon* OR urologist*) ADJ2 (patient* OR family* OR carer* OR caregiver* OR GP OR GPs OR general-practitioner* OR psychologist* OR psychiatrist*)))))).ti,kf.) AND (Surveys and Questionnaires/ OR Behavior Rating Scale/ OR exp clinical trial/ OR Interview, Psychological/ OR Psychometrics/ OR exp Validation Study/ OR (questionnaire* OR survey* OR mixed-method* OR scale* OR score* OR scoring OR assessment* OR trial* OR random* OR RCT OR RCTs OR interview* OR tool* OR AITCS* OR quantitativ* OR validation OR likert* OR psychometr*).ab,ti,kf.) NOT (news OR congres* OR abstract* OR book* OR chapter* OR dissertation abstract*).pt. AND english.la.

**Cochrane**

#1

(((interphysician* OR inter-physician* OR physician* NEXT physician* OR doctor* NEXT doctor* OR interdoctor* OR inter-doctor* OR clinician* NEXT clinician* OR inter-clinician* OR interclinician OR specialist* NEXT specialist* OR interspecialist* OR inter-specialist*) NEAR/6 (collaborat* OR communicat* OR cooperat* OR handover* OR hand-off* OR handoff* OR changeover* OR signout* OR sign-out* OR transitional-care* OR transition-of-care*))):ab,ti OR (((collaborat* OR communicat* OR cooperat* OR handover* OR hand-off* OR handoff* OR changeover* OR signout* OR sign-out* OR transitional-care* OR transition-of-care*) NEAR/6 (physician* OR doctor* OR clinician* OR medical-profession* OR anesthesiologist* OR anaesthesiologist* OR cardiologist* OR dermatologist* OR endocrinologist* OR geriatrician* OR gynecologist* OR gynaecologist* OR urogynecologist* OR urogynaecologist* OR hematologist* OR haematologist* OR neurologist* OR obstetrician* OR oncologist* OR otolaryngologist* OR pathologist* OR cytopathologist* OR pediatrician* OR paediatrician* OR pulmonologist* OR pneumologist* OR radiologist* OR rontgenologist* OR roentgenologist* OR rheumatologist* OR surgeon* OR neurosurgeon* OR urologist* OR intraprofessional OR interprofessional OR interdisciplinary OR inter-disciplinary OR intradisciplinary OR intra-disciplinary OR transdisciplinary OR trans-disciplinary OR multidisciplinary OR multi-disciplinary OR cross-disciplinary OR crossdisciplinary OR diabetologist* OR epileptologist* OR gastroenterologist* OR gerontologist* OR hepatologist* OR immunologist* OR intensivist* OR internist* OR geneticist* OR neonatologist* OR nephrologist* OR ophthalmologist* OR phlebologist* OR physiatrist* OR podiatrist* OR vaccinologist* OR venereologist* OR staff*)) NOT (((nurse* OR ((physician* OR doctor* OR clinician* OR medical-profession* OR anesthesiologist* OR anaesthesiologist* OR cardiologist* OR dermatologist* OR endocrinologist* OR geriatrician* OR gynecologist* OR gynaecologist* OR urogynecologist* OR urogynaecologist* OR hematologist* OR haematologist* OR neurologist* OR obstetrician* OR oncologist* OR otolaryngologist* OR pathologist* OR cytopathologist* OR pediatrician* OR paediatrician* OR pulmonologist* OR pneumologist* OR radiologist* OR rontgenologist* OR roentgenologist* OR rheumatologist* OR surgeon* OR neurosurgeon* OR urologist*) NEAR/2 (patient* OR family* OR carer* OR caregiver* OR GP OR GPs OR general-practitioner* OR psychologist* OR psychiatrist*)))))):ti

#2

((questionnaire* OR survey* OR mixed-method* OR scale* OR score* OR scoring OR assessment* OR trial* OR random* OR RCT OR RCTs OR interview* OR tool* OR AITCS* OR quantitativ* OR validation OR likert* OR psychometr*):ab,ti)

#1 AND #2 (due to syntax problem with additional parentheses around #1)

**Web of Science**

(TS=(((interphysician* OR inter-physician* OR physician*-physician* OR doctor*-doctor* OR interdoctor* OR inter-doctor* OR clinician*-clinician* OR inter-clinician* OR interclinician OR specialist*-specialist* OR interspecialist* OR inter-specialist*) NEAR/5 (collaborat* OR communicat* OR cooperat* OR handover* OR hand-off* OR handoff* OR changeover* OR signout* OR sign-out* OR transitional-care* OR transition-of-care*))) OR TI=(((collaborat* OR communicat* OR cooperat* OR handover* OR hand-off* OR handoff* OR changeover* OR signout* OR sign-out* OR transitional-care* OR transition-of-care*) NEAR/5 (physician* OR doctor* OR clinician* OR medical-profession* OR anesthesiologist* OR anaesthesiologist* OR cardiologist* OR dermatologist* OR endocrinologist* OR geriatrician* OR gynecologist* OR gynaecologist* OR urogynecologist* OR urogynaecologist* OR hematologist* OR haematologist* OR neurologist* OR obstetrician* OR oncologist* OR otolaryngologist* OR pathologist* OR cytopathologist* OR pediatrician* OR paediatrician* OR pulmonologist* OR pneumologist* OR radiologist* OR rontgenologist* OR roentgenologist* OR rheumatologist* OR surgeon* OR neurosurgeon* OR urologist* OR intraprofessional OR interprofessional OR interdisciplinary OR inter-disciplinary OR intradisciplinary OR intra-disciplinary OR transdisciplinary OR trans-disciplinary OR multidisciplinary OR multi-disciplinary OR cross-disciplinary OR crossdisciplinary OR diabetologist* OR epileptologist* OR gastroenterologist* OR gerontologist* OR hepatologist* OR immunologist* OR intensivist* OR internist* OR geneticist* OR neonatologist* OR nephrologist* OR ophthalmologist* OR phlebologist* OR physiatrist* OR podiatrist* OR vaccinologist* OR venereologist* OR staff*)) NOT (((nurse* OR ((physician* OR doctor* OR clinician* OR medical-profession* OR anesthesiologist* OR anaesthesiologist* OR cardiologist* OR dermatologist* OR endocrinologist* OR geriatrician* OR gynecologist* OR gynaecologist* OR urogynecologist* OR urogynaecologist* OR hematologist* OR haematologist* OR neurologist* OR obstetrician* OR oncologist* OR otolaryngologist* OR pathologist* OR cytopathologist* OR pediatrician* OR paediatrician* OR pulmonologist* OR pneumologist* OR radiologist* OR rontgenologist* OR roentgenologist* OR rheumatologist* OR surgeon* OR neurosurgeon* OR urologist*) NEAR/2 (patient* OR family* OR carer* OR caregiver* OR GP OR GPs OR general-practitioner* OR psychologist* OR psychiatrist*))))))) AND TS=(((questionnaire* OR survey* OR mixed-method* OR scale* OR score* OR scoring OR assessment* OR trial* OR random* OR RCT OR RCTs OR interview* OR tool* OR AITCS* OR quantitativ* OR validation OR likert* OR psychometr*)))

**PsycInfo**

((((Collaboration/ OR Cooperation/ OR Scientific Communication/) AND (Physicians/ OR Gynecologists/ OR Internists/ OR Neurologists/ OR Obstetricians/ OR Pathologists/ OR Pediatricians/ OR Surgeons/ OR Clinicians/ OR Specialization/)) NOT (exp Nurses/)) OR (((interphysician* OR inter-physician* OR physician*-physician* OR doctor*-doctor* OR interdoctor* OR inter-doctor* OR clinician*-clinician* OR inter-clinician* OR interclinician OR specialist*-specialist* OR interspecialist* OR inter-specialist*) ADJ6 (collaborat* OR communicat* OR cooperat* OR handover* OR hand-off* OR handoff* OR changeover* OR signout* OR sign-out* OR transitional-care* OR transition-of-care*))).ab,ti. OR (((collaborat* OR communicat* OR cooperat* OR handover* OR hand-off* OR handoff* OR changeover* OR signout* OR sign-out* OR transitional-care* OR transition-of-care*) ADJ6 (physician* OR doctor* OR clinician* OR medical-profession* OR anesthesiologist* OR anaesthesiologist* OR cardiologist* OR dermatologist* OR endocrinologist* OR geriatrician* OR gynecologist* OR gynaecologist* OR urogynecologist* OR urogynaecologist* OR hematologist* OR haematologist* OR neurologist* OR obstetrician* OR oncologist* OR otolaryngologist* OR pathologist* OR cytopathologist* OR pediatrician* OR paediatrician* OR pulmonologist* OR pneumologist* OR radiologist* OR rontgenologist* OR roentgenologist* OR rheumatologist* OR surgeon* OR neurosurgeon* OR urologist* OR intraprofessional OR interprofessional OR interdisciplinary OR inter-disciplinary OR intradisciplinary OR intra-disciplinary OR transdisciplinary OR trans-disciplinary OR multidisciplinary OR multi-disciplinary OR cross-disciplinary OR crossdisciplinary OR diabetologist* OR epileptologist* OR gastroenterologist* OR gerontologist* OR hepatologist* OR immunologist* OR intensivist* OR internist* OR geneticist* OR neonatologist* OR nephrologist* OR ophthalmologist* OR phlebologist* OR physiatrist* OR podiatrist* OR vaccinologist* OR venereologist* OR staff*)) NOT (((nurse* OR ((physician* OR doctor* OR clinician* OR medical-profession* OR anesthesiologist* OR anaesthesiologist* OR cardiologist* OR dermatologist* OR endocrinologist* OR geriatrician* OR gynecologist* OR gynaecologist* OR urogynecologist* OR urogynaecologist* OR hematologist* OR haematologist* OR neurologist* OR obstetrician* OR oncologist* OR otolaryngologist* OR pathologist* OR cytopathologist* OR pediatrician* OR paediatrician* OR pulmonologist* OR pneumologist* OR radiologist* OR rontgenologist* OR roentgenologist* OR rheumatologist* OR surgeon* OR neurosurgeon* OR urologist*) ADJ2 (patient* OR family* OR carer* OR caregiver* OR GP OR GPs OR general-practitioner* OR psychologist* OR psychiatrist*)))))).ti.) AND (exp Questionnaires/ OR exp Surveys/ OR exp Rating Scales/ OR exp Clinical Trials/ OR exp Interviews/ OR Psychometrics/ OR Test Validity/ OR (questionnaire* OR survey* OR mixed-method* OR scale* OR score* OR scoring OR assessment* OR trial* OR random* OR RCT OR RCTs OR interview* OR tool* OR AITCS* OR quantitativ* OR validation OR likert* OR psychometr*).ab,ti.) NOT (news OR congres* OR abstract* OR book* OR chapter* OR dissertation abstract*).pt. AND english.la.

**Google Scholar**

interphysician|interclinician|"inter|between physician|doctor|clinician|specialist -nurse" collaboration|communication|cooperation|handover|handoff|changeover|signout questionnaire|survey|"mixed method"|scale|score|scoring|interview|tool|AITCS|likert

Single quotes:

interphysician|interclinician| 'inter|between physician|doctor|clinician|specialist -nurse ' collaboration|communication|cooperation|handover|handoff|changeover|signout questionnaire|survey| 'mixed method '|scale|score|scoring|interview|tool|AITCS|likert
